# Supplementary material for: Environmentally Induced Epigenetic Transgenerational Inheritance of Altered Sertoli Cell Transcriptome and Epigenome: Molecular Etiology of Male Infertility
Source: PubMed Central journal article supplement (PMC3610698; doi:10.1371/journal.pone.0059922), 2013-03-28

Supplemental Figure S2 (Color)

a)

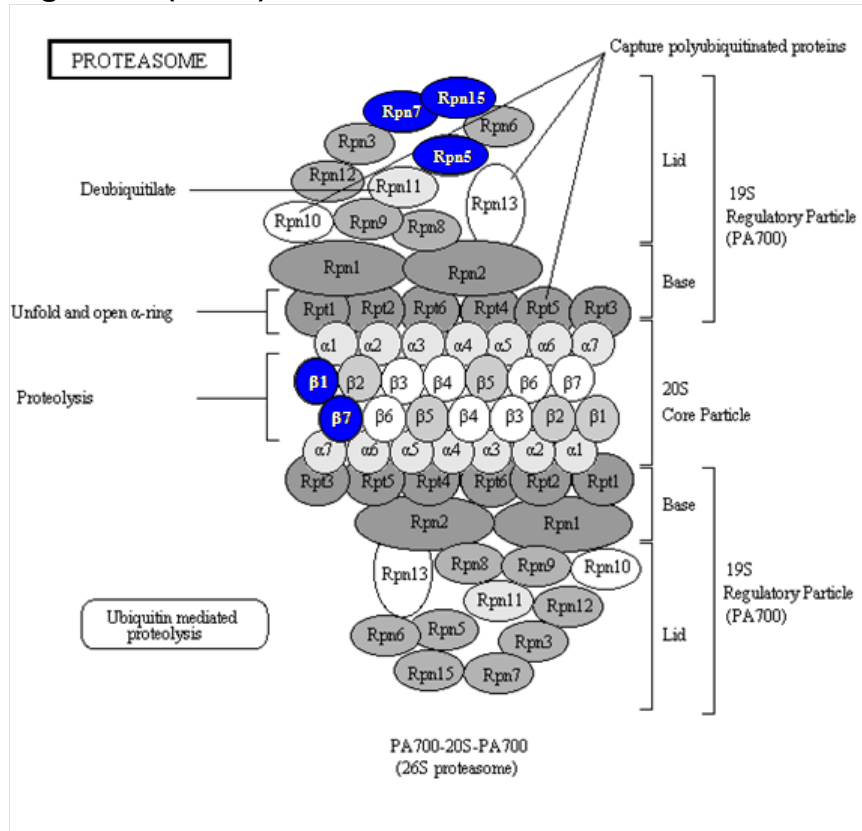

b)

NUCLEOTIDE EXCISION REPAIR

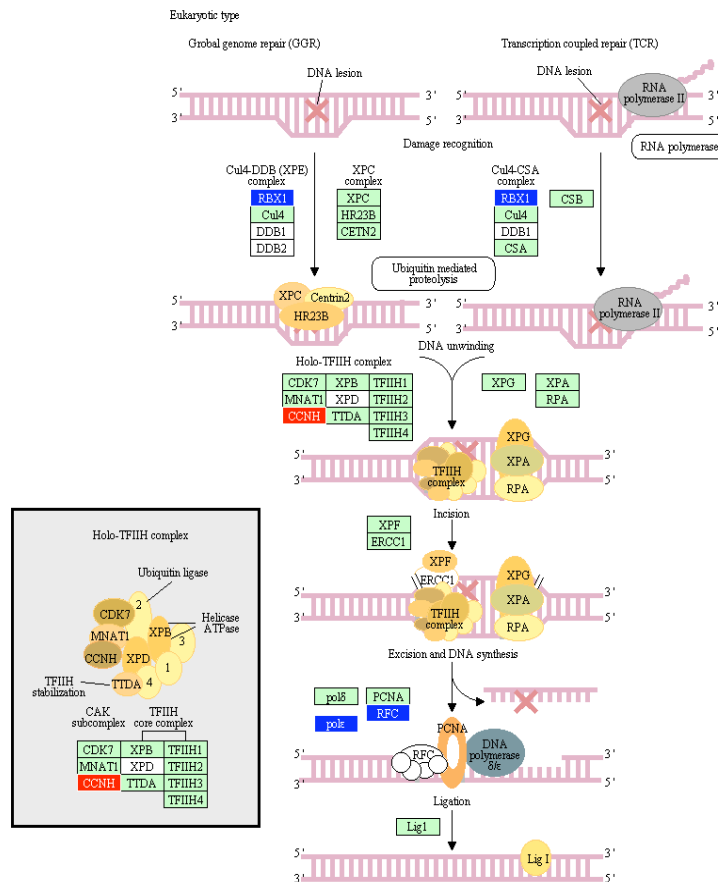

# Supplemental Figure S2 (Cont.)

c)

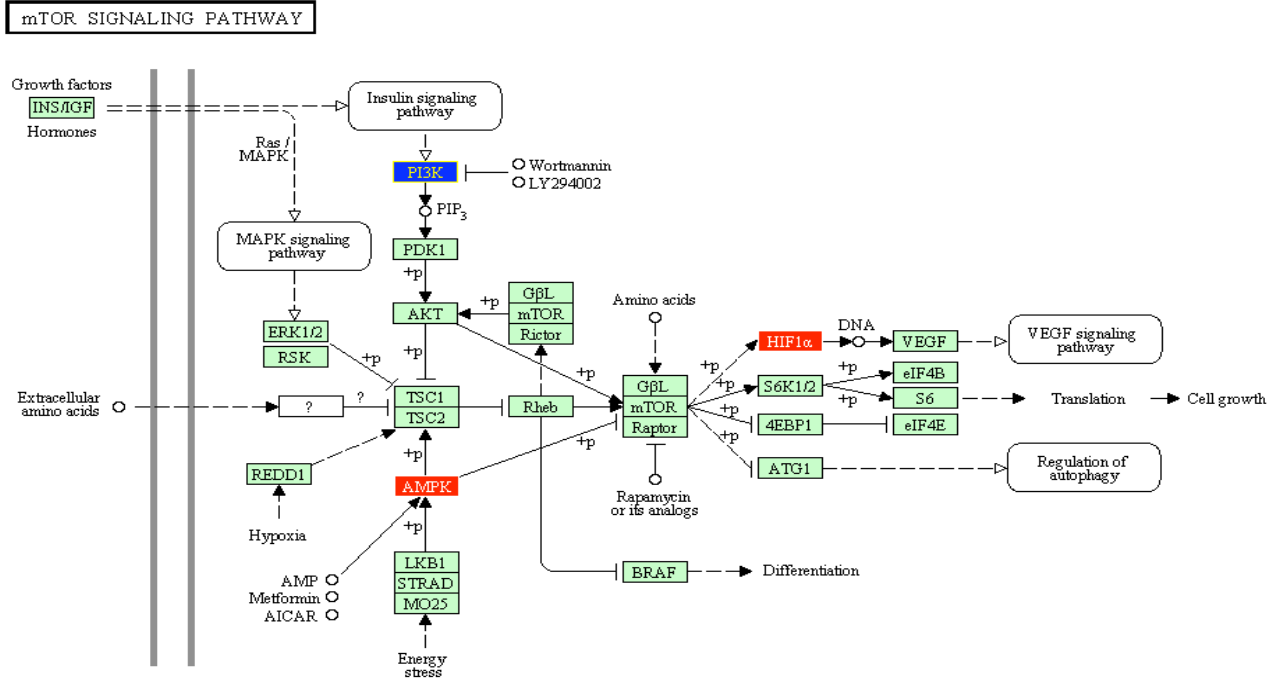

d)

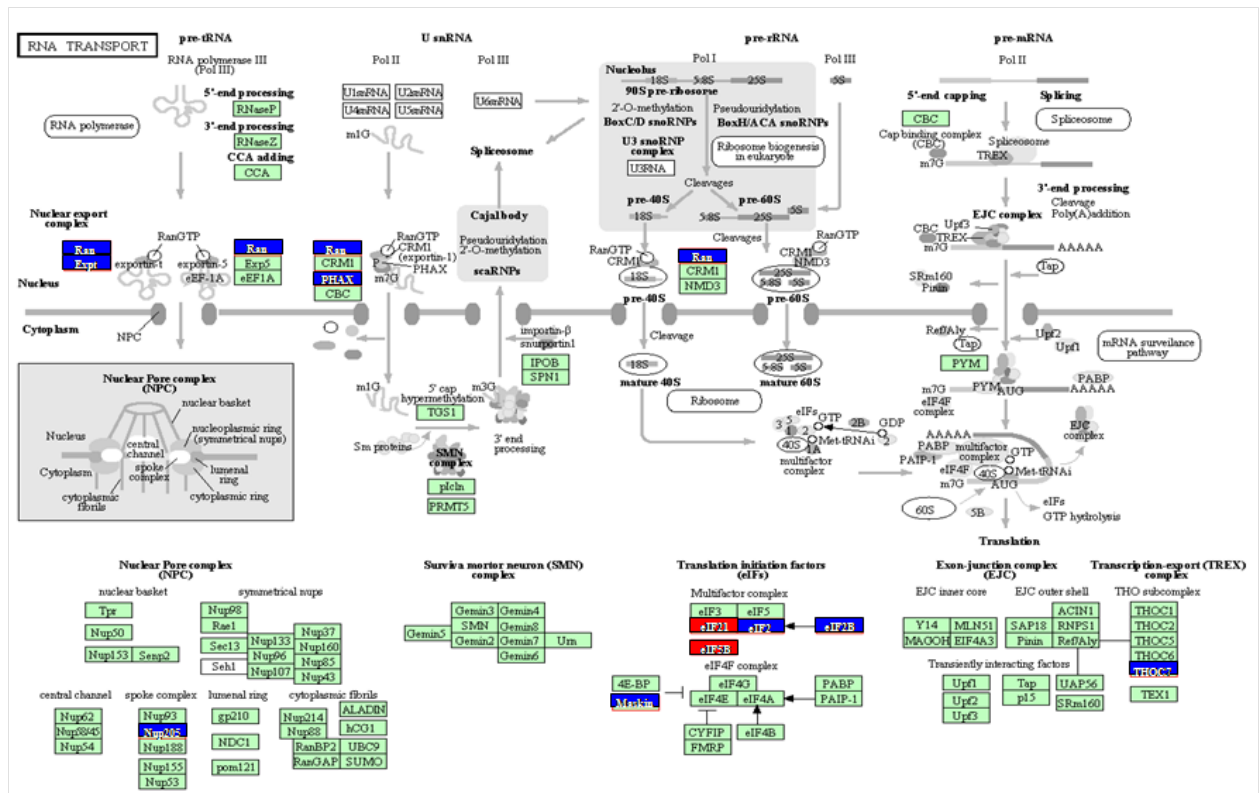

Supplement: pone.0059922.s002.pdf [file pone.0059922.s002.pdf]
