# Supplementary material for: Environmentally Induced Epigenetic Transgenerational Inheritance of Altered Sertoli Cell Transcriptome and Epigenome: Molecular Etiology of Male Infertility
Source: PubMed Central journal article supplement (PMC3610698; doi:10.1371/journal.pone.0059922), 2013-03-28
Supplement: pone.0059922.s004.pdf [file pone.0059922.s004.pdf]

**Supplemental Table S1.**

**Differentially expressed genes from F3 generation vinclozolin lineage Sertoli cells as compared to control lineage cells (416 genes & ESTs)**

| Gene Symbol             | GenBank, Reference Sequence | Ratio (Vin/C on) | mean_dif (Vin-Con) | ProbeSet ID | Gene Title                                                |
|-------------------------|-----------------------------|------------------|--------------------|-------------|-----------------------------------------------------------|
| <b>Apoptosis</b>        |                             |                  |                    |             |                                                           |
| Card6                   | NM_001106413                | <b>1.27</b>      | <b>16</b>          | 10821685    | caspase recruitment domain family, member 6               |
| Diablo                  | NM_001008292                | <b>0.69</b>      | <b>-271</b>        | 10758432    | diablo homolog (Drosophila)                               |
| Lins1                   | XM_218748                   | <b>0.80</b>      | <b>-19</b>         | 10707837    | lines homolog 1 (Drosophila)                              |
| Pdcd2l                  | NM_001109544                | <b>0.78</b>      | <b>-22</b>         | 10720982    | programmed cell death 2-like                              |
| Pdcd5                   | NM_001106247                | <b>0.74</b>      | <b>-76</b>         | 10721120    | programmed cell death 5                                   |
| <b>Cell Cycle</b>       |                             |                  |                    |             |                                                           |
| Ccne1                   | NM_001100821                | <b>0.77</b>      | <b>-14</b>         | 10721176    | cyclin E1                                                 |
| Ccnh                    | NM_052981                   | <b>1.20</b>      | <b>41</b>          | 10812363    | cyclin H                                                  |
| Ccnt2                   | NM_001107171                | <b>1.21</b>      | <b>157</b>         | 10767280    | cyclin T2                                                 |
| Ccny                    | XM_341545                   | <b>0.81</b>      | <b>-60</b>         | 10798952    | cyclin Y                                                  |
| Cdc25c                  | NM_001107396                | <b>0.81</b>      | <b>-21</b>         | 10803824    | cell division cycle 25 homolog C (S. pombe)               |
| Cdca3                   | NM_001007648                | <b>0.63</b>      | <b>-16</b>         | 10858707    | cell division cycle associated 3                          |
| Centpn                  | NM_001008366                | <b>0.70</b>      | <b>-46</b>         | 10808197    | centromere protein N                                      |
| Cspp1                   | XM_342793                   | <b>1.33</b>      | <b>61</b>          | 10875064    | centrosome and spindle pole associated protein 1          |
| Chfr                    | NM_001009258                | <b>0.81</b>      | <b>-31</b>         | 10763116    | checkpoint with forkhead and ring finger domains          |
| Pot1b                   | XM_001073777                | <b>1.36</b>      | <b>14</b>          | 10931288    | protection of telomeres 1B                                |
| Rbbp8                   | NM_001134417                | <b>1.36</b>      | <b>56</b>          | 10800173    | retinoblastoma binding protein 8                          |
| Syce2                   | XM_344745                   | <b>0.82</b>      | <b>-41</b>         | 10810040    | synaptonemal complex central element protein 2            |
| Tmem30c                 | NM_001105889                | <b>0.78</b>      | <b>-15</b>         | 10750701    | transmembrane protein 30C                                 |
| Tacc3                   | NM_001004424                | <b>0.78</b>      | <b>-19</b>         | 10777770    | transforming, acidic coiled-coil containing protein 3     |
| <b>Cytoskeleton-ECM</b> |                             |                  |                    |             |                                                           |
| Actr10                  | NM_001009602                | <b>0.74</b>      | <b>-251</b>        | 10885031    | actin-related protein 10 homolog (S. cerevisiae)          |
| Actr6                   | NM_001108081                | <b>1.39</b>      | <b>211</b>         | 10901771    | ARP6 actin-related protein 6 homolog (yeast)              |
| Dnah2                   | XP_220603                   | <b>0.71</b>      | <b>-14</b>         | 10743989    | dynein, axonemal, heavy chain 2                           |
| Eml5                    | AY445136                    | <b>1.50</b>      | <b>78</b>          | 10891561    | echinoderm microtubule associated protein like 5          |
| Esco1                   | NM_001126299                | <b>1.67</b>      | <b>121</b>         | 10767013    | establishment of cohesion 1 homolog 1 (S. cerevisiae)     |
| Kif27                   | NM_198050                   | <b>0.73</b>      | <b>-27</b>         | 10793846    | kinesin family member 27                                  |
| Lysmd3                  | NM_001009698                | <b>1.26</b>      | <b>15</b>          | 10812339    | LysM, putative peptidoglycan-binding, domain containing 3 |
| Odf4                    | NM_001007670                | <b>0.65</b>      | <b>-49</b>         | 10743797    | outer dense fiber of sperm tails 4                        |
| Rpain                   | NM_001033060                | <b>0.81</b>      | <b>-16</b>         | 10735400    | RPA interacting protein                                   |
| Sgcb                    | XM_001056227                | <b>1.26</b>      | <b>88</b>          | 10772318    | sarcoglycan, beta (dystrophin-associated glycoprotein)    |
| Svil                    | NM_001108416                | <b>1.27</b>      | <b>14</b>          | 10798794    | supervillin                                               |
| Ttll13                  | NM_001134962                | <b>0.67</b>      | <b>-28</b>         | 10708172    | tubulin tyrosine ligase-like family, member 13            |
| Tubg1                   | NM_145778                   | <b>0.78</b>      | <b>-15</b>         | 10738296    | tubulin, gamma 1                                          |
| RGD1560248              | XM_575134                   | <b>1.30</b>      | <b>40</b>          | 10836212    | similar to formin-like 2 isoform B                        |
| <b>Development</b>      |                             |                  |                    |             |                                                           |
| Angel2                  | NM_001135119                | <b>0.80</b>      | <b>-63</b>         | 10766709    | angel homolog 2 (Drosophila)                              |
| B9d1                    | NM_001105786                | <b>0.77</b>      | <b>-26</b>         | 10734250    | B9 protein domain 1                                       |
| Bbs2                    | NM_053618                   | <b>0.79</b>      | <b>-100</b>        | 10806016    | Bardet-Biedl syndrome 2                                   |
| Bbs9                    | XM_235942                   | <b>0.72</b>      | <b>-69</b>         | 10908617    | Bardet-Biedl syndrome 9                                   |
| Bspry                   | NM_022261                   | <b>0.66</b>      | <b>-33</b>         | 10869331    | B-box and SPRY domain containing                          |
| Cby1                    | NM_145676                   | <b>0.74</b>      | <b>-43</b>         | 10897698    | chibby homolog 1 (Drosophila)                             |
| Crbn                    | NM_001015003                | <b>1.57</b>      | <b>172</b>         | 10864525    | cereblon                                                  |
| Dynlt1                  | NM_031318                   | <b>0.79</b>      | <b>-216</b>        | 10717882    | dynein light chain Tctex-type 1                           |
| Emg1                    | NM_001107888                | <b>0.73</b>      | <b>-115</b>        | 10865452    | EMG1 nucleolar protein homolog (S. cerevisiae)            |
| Fbn1                    | NM_031825                   | <b>1.41</b>      | <b>44</b>          | 10849327    | fibillin 1                                                |
| Gtsf1                   | NM_001079707                | <b>0.56</b>      | <b>-61</b>         | 10907722    | gametocyte specific factor 1                              |
| Lrrc48                  | NM_001013857                | <b>0.73</b>      | <b>-83</b>         | 10734045    | leucine rich repeat containing 48                         |
| Lrrc56                  | NM_001024902                | <b>0.69</b>      | <b>-24</b>         | 10712224    | leucine rich repeat containing 56                         |
| Lrrc8b                  | NM_001107204                | <b>1.24</b>      | <b>30</b>          | 10775278    | leucine rich repeat containing 8 family, member B         |
| Mospd1                  | NM_001014107                | <b>1.45</b>      | <b>20</b>          | 10778399    | motile sperm domain containing 1                          |
| Odz4                    | XM_218927                   | <b>1.42</b>      | <b>23</b>          | 10708695    | odz, odd Oz/ten-m homolog 4 (Drosophila)                  |

|                           |                 |             |             |          |                                                                                                                          |
|---------------------------|-----------------|-------------|-------------|----------|--------------------------------------------------------------------------------------------------------------------------|
| Sav1                      | NM_001097581    | <b>0.77</b> | <b>-28</b>  | 10890397 | salvador homolog 1 (Drosophila)                                                                                          |
| Shfm1                     | NM_001126090    | <b>0.70</b> | <b>-141</b> | 10860939 | split hand/foot malformation (ectrodactyly) type 1                                                                       |
| Ssna1                     | NM_001107820    | <b>0.66</b> | <b>-110</b> | 10843396 | Sjogren syndrome nuclear autoantigen 1                                                                                   |
| Surf4                     | NM_001033868    | <b>0.81</b> | <b>-76</b>  | 10843893 | surfeit 4                                                                                                                |
| Urb2                      | NM_001135708    | <b>0.64</b> | <b>-174</b> | 10808764 | URB2 ribosome biogenesis 2 homolog (S. cerevisiae)                                                                       |
| Vwa5a                     | NM_198755       | <b>1.52</b> | <b>51</b>   | 10909210 | von Willebrand factor A domain containing 5A                                                                             |
| Wbscr17                   | NM_001025112    | <b>0.64</b> | <b>-24</b>  | 10757940 | Williams-Beuren syndrome chromosome region 17 homolog (human)                                                            |
| LOC687994                 | XM_001080810    | <b>1.27</b> | <b>48</b>   | 10867109 | similar to 82-kD FMRP Interacting Protein                                                                                |
| RGD1562629                | XM_001059612    | <b>1.22</b> | <b>51</b>   | 10823252 | similar to neurobeachin                                                                                                  |
| <b>DNA Repair</b>         |                 |             |             |          |                                                                                                                          |
| Mdc1                      | NM_001166275    | <b>0.70</b> | <b>-85</b>  | 10831041 | mediator of DNA damage checkpoint 1                                                                                      |
| Rad54l                    | NM_001134960    | <b>0.75</b> | <b>-31</b>  | 10871151 | RAD54 like (S. cerevisiae)                                                                                               |
| Rad9b                     | NM_001030042    | <b>0.79</b> | <b>-44</b>  | 10758587 | RAD9 homolog B (S. cerevisiae)                                                                                           |
| Rad54b                    | XM_232785       | <b>0.73</b> | <b>-12</b>  | 10867642 | RAD54 homolog B (S. cerevisiae)                                                                                          |
| <b>Electron Transport</b> |                 |             |             |          |                                                                                                                          |
| Cox5b                     | NM_053586       | <b>0.73</b> | <b>-80</b>  | 10922572 | cytochrome c oxidase subunit Vb                                                                                          |
| LOC305698                 | XM_223806       | <b>1.31</b> | <b>13</b>   | 10786123 | similar to Glutaredoxin-1 (Thioltransferase-1) (TTase-1)                                                                 |
| LOC685322                 | NM_001170465    | <b>0.72</b> | <b>-37</b>  | 10778108 | similar to ubiquinol-cytochrome c reductase complex 7.2kDa protein isoform b                                             |
| LOC688869                 | NM_001145273    | <b>0.81</b> | <b>-133</b> | 10720721 | similar to cytochrome c oxidase, subunit Vlb polypeptide 1                                                               |
| Prdx5                     | NM_053610       | <b>0.79</b> | <b>-48</b>  | 10728240 | peroxiredoxin 5                                                                                                          |
| Asf1b                     | NM_001107160    | <b>0.64</b> | <b>-79</b>  | 10810230 | ASF1 anti-silencing function 1 homolog B (S. cerevisiae)                                                                 |
| Chd2                      | NM_001107523    | <b>1.29</b> | <b>66</b>   | 10722770 | chromodomain helicase DNA binding protein 2                                                                              |
| Gadd45g                   | NM_001077640    | <b>1.47</b> | <b>51</b>   | 10797527 | growth arrest and DNA-damage-inducible, gamma                                                                            |
| Hdac1                     | NM_001025409    | <b>0.74</b> | <b>-127</b> | 10880012 | histone deacetylase 1                                                                                                    |
| Helq                      | NM_001014134    | <b>0.73</b> | <b>-15</b>  | 10771371 | helicase, POLQ-like                                                                                                      |
| Hells                     | NM_001106371    | <b>1.92</b> | <b>104</b>  | 10715200 | helicase, lymphoid specific                                                                                              |
| Hist1h2bn                 | NM_001106114    | <b>0.75</b> | <b>-99</b>  | 10798494 | histone cluster 1, H2bn                                                                                                  |
| Jmjd1c                    | XP_228122       | <b>1.31</b> | <b>43</b>   | 10832808 | jumonji domain containing 1C                                                                                             |
| L3mbtl3                   | NM_001107612    | <b>1.45</b> | <b>36</b>   | 10702165 | l(3)mbt-like 3 (Drosophila)                                                                                              |
| LOC682649                 | ENSRNOT00000004 | <b>0.76</b> | <b>-278</b> | 10795265 | similar to Histone H2A type 1                                                                                            |
| Recql                     | NM_001012098    | <b>0.81</b> | <b>-37</b>  | 10866672 | RecQ protein-like (DNA helicase Q1-like)                                                                                 |
| LOC100361110              | XM_002727043    | <b>0.81</b> | <b>-12</b>  | 10917992 | histone H3.3B-like                                                                                                       |
| RGD1564767                | NM_001024282    | <b>0.76</b> | <b>-44</b>  | 10795196 | Histone H2a                                                                                                              |
| <b>Golgi Apparatus</b>    |                 |             |             |          |                                                                                                                          |
| Ap3m1                     | NM_133593       | <b>1.26</b> | <b>96</b>   | 10779018 | adaptor-related protein complex 3, mu 1 subunit                                                                          |
| Ap3m2                     | NM_133305       | <b>0.68</b> | <b>-17</b>  | 10789074 | adaptor-related protein complex 3, mu 2 subunit                                                                          |
| Ap4b1                     | NM_001107709    | <b>0.79</b> | <b>-44</b>  | 10818021 | adaptor-related protein complex 4, beta 1 subunit                                                                        |
| Gbf1                      | XM_219953       | <b>0.76</b> | <b>-125</b> | 10715746 | golgi-specific brefeldin A resistant guanine nucleotide exchange factor 1                                                |
| Golim4                    | BC091440        | <b>1.58</b> | <b>154</b>  | 10823742 | golgi integral membrane protein 4                                                                                        |
| Hs6st1                    | NM_001108210    | <b>1.40</b> | <b>100</b>  | 10922489 | heparan sulfate 6-O-sulfotransferase 1                                                                                   |
| Ogt                       | NM_017107       | <b>1.26</b> | <b>319</b>  | 10934445 | O-linked N-acetylglucosamine (GlcNAc) transferase (UDP-N-acetylglucosamine:polypeptide-N-acetylglucosaminyl transferase) |
| Plbd2                     | NM_139255       | <b>0.83</b> | <b>-93</b>  | 10758830 | phospholipase B domain containing 2                                                                                      |
| Pofut1                    | NM_001002278    | <b>0.78</b> | <b>-18</b>  | 10841011 | protein O-fucosyltransferase 1                                                                                           |
| Pomt1                     | NM_053406       | <b>0.76</b> | <b>-85</b>  | 10835530 | protein-O-mannosyltransferase 1                                                                                          |
| Rpn2                      | NM_031698       | <b>0.83</b> | <b>-215</b> | 10841602 | ribophorin II                                                                                                            |
| RGD1560511                | NM_001107355    | <b>1.79</b> | <b>355</b>  | 10798666 | similar to Vps41 protein                                                                                                 |
| <b>Growth Factors</b>     |                 |             |             |          |                                                                                                                          |
| Creld2                    | NM_001037208    | <b>0.80</b> | <b>-97</b>  | 10898456 | cysteine-rich with EGF-like domains 2                                                                                    |
| Hdgfl1                    | NM_133549       | <b>0.52</b> | <b>-133</b> | 10795072 | hepatoma derived growth factor-like 1                                                                                    |
| Igf1r                     | NM_052807       | <b>0.82</b> | <b>-53</b>  | 10707889 | insulin-like growth factor 1 receptor                                                                                    |
| Insl6                     | NM_022583       | <b>0.58</b> | <b>-15</b>  | 10729596 | insulin-like 6                                                                                                           |
| Sep11                     | NM_001107208    | <b>1.28</b> | <b>58</b>   | 10775769 | septin 11                                                                                                                |
| <b>Immune Response</b>    |                 |             |             |          |                                                                                                                          |
| F3                        | NM_013057       | <b>1.86</b> | <b>101</b>  | 10818708 | coagulation factor III (thromboplastin, tissue factor)                                                                   |
| Hmcn1                     | XM_222716       | <b>1.34</b> | <b>44</b>   | 10768426 | hemicentin 1                                                                                                             |
| Lair1                     | NM_001029928    | <b>1.34</b> | <b>77</b>   | 10704133 | leukocyte-associated immunoglobulin-like receptor 1                                                                      |
| Lims1                     | NM_001145456    | <b>1.24</b> | <b>84</b>   | 10833523 | LIM and senescent cell antigen-like domains 1                                                                            |

|                                   |              |      |      |          |                                                                                                                                      |
|-----------------------------------|--------------|------|------|----------|--------------------------------------------------------------------------------------------------------------------------------------|
| Stag1                             | NM_001108179 | 1.46 | 129  | 10912525 | stromal antigen 1                                                                                                                    |
| LOC687600                         | XR_006786    | 0.74 | -31  | 10761917 | similar to B-cell CLL/lymphoma 7A                                                                                                    |
| LOC690041                         | XP_001073004 | 1.31 | 10   | 10940120 | X-linked lymphocyte-regulated 3A                                                                                                     |
| <b>Metabolism &amp; Transport</b> |              |      |      |          |                                                                                                                                      |
| Acbd5                             | NM_001077635 | 1.37 | 168  | 10796785 | acyl-Coenzyme A binding domain containing 5                                                                                          |
| Arsk                              | NM_001047917 | 1.44 | 41   | 10820073 | arylsulfatase family, member K                                                                                                       |
| Atox1                             | NM_053359    | 0.79 | -16  | 10742813 | ATX1 antioxidant protein 1 homolog (yeast)                                                                                           |
| Atp5e                             | NM_139099    | 0.76 | -89  | 10773636 | ATP synthase, H+ transporting, mitochondrial F1 complex, epsilon subunit                                                             |
| Atp5i                             | NM_080481    | 0.67 | -40  | 10770996 | ATP synthase, H+ transporting, mitochondrial F0 complex, subunit E                                                                   |
| Atp5o                             | NM_138883    | 0.81 | -42  | 10753198 | ATP synthase, H+ transporting, mitochondrial F1 complex, O subunit                                                                   |
| Atp6v1g1                          | NM_001106660 | 0.76 | -259 | 10869483 | ATPase, H transporting, lysosomal V1 subunit G1                                                                                      |
| Atp8b3                            | XM_234937    | 0.60 | -93  | 10893797 | ATPase, Class I, type 8B, member 3                                                                                                   |
| Cbr4                              | NM_182672    | 0.78 | -26  | 10791401 | carbonyl reductase 4                                                                                                                 |
| Cds1                              | NM_031242    | 0.61 | -62  | 10775503 | CDP-diacylglycerol synthase 1                                                                                                        |
| Cp                                | NM_012532    | 1.93 | 109  | 10814430 | ceruloplasmin                                                                                                                        |
| Cpt2                              | NM_012930    | 0.60 | -94  | 10878564 | carnitine palmitoyltransferase 2                                                                                                     |
| Dis3                              | NM_001127483 | 1.51 | 135  | 10785565 | DIS3 mitotic control homolog ( <i>S. cerevisiae</i> )                                                                                |
| Dlat                              | NM_031025    | 0.74 | -59  | 10793304 | dihydrolipoamide S-acetyltransferase                                                                                                 |
| Dnttip1                           | NM_134400    | 0.81 | -33  | 10842172 | deoxynucleotidyltransferase, terminal, interacting protein 1                                                                         |
| Exoc3l                            | NM_001106178 | 1.31 | 132  | 10810570 | exocyst complex component 3-like                                                                                                     |
| Exosc5                            | NM_001107493 | 0.80 | -74  | 10705202 | exosome component 5                                                                                                                  |
| Faah                              | NM_024132    | 0.74 | -16  | 10871182 | fatty acid amide hydrolase                                                                                                           |
| Gpat2                             | NM_001168529 | 0.71 | -28  | 10839598 | glycerol-3-phosphate acyltransferase 2, mitochondrial                                                                                |
| Gpd2                              | NM_012736    | 1.38 | 20   | 10836277 | glycerol-3-phosphate dehydrogenase 2, mitochondrial                                                                                  |
| Hadhb                             | NM_133618    | 0.81 | -128 | 10889074 | hydroxyacyl-Coenzyme A dehydrogenase/3-ketoacyl-Coenzyme A thiolase/enoyl-Coenzyme A hydratase (trifunctional protein), beta subunit |
| Hagh                              | NM_033349    | 0.72 | -71  | 10732228 | hydroxyacyl glutathione hydrolase                                                                                                    |
| Ldhal6b                           | NM_183334    | 0.72 | -14  | 10717861 | lactate dehydrogenase A-like 6B                                                                                                      |
| Lhpp                              | NM_001009706 | 0.83 | -30  | 10711715 | phospholysine phosphohistidine inorganic pyrophosphate phosphatase                                                                   |
| Mdh1b                             | XP_237203    | 1.58 | 305  | 10928522 | malate dehydrogenase 1B, NAD (soluble)                                                                                               |
| Ndufa12                           | NM_001106781 | 0.72 | -135 | 10894993 | NADH dehydrogenase (ubiquinone) 1 alpha subcomplex, 12                                                                               |
| Ndufb5                            | NM_001106426 | 0.81 | -177 | 10814788 | NADH dehydrogenase (ubiquinone) 1 beta subcomplex, 5                                                                                 |
| Ndufb9                            | NM_001127294 | 0.74 | -74  | 10903936 | NADH dehydrogenase (ubiquinone) 1 beta subcomplex, 9                                                                                 |
| Ndufs5                            | NM_001030052 | 0.66 | -51  | 10879662 | NADH dehydrogenase (ubiquinone) Fe-S protein 5                                                                                       |
| Ndufs6                            | NM_019223    | 0.71 | -87  | 10793236 | NADH dehydrogenase (ubiquinone) Fe-S protein 6                                                                                       |
| Nppc                              | NM_053750    | 1.39 | 16   | 10929606 | natriuretic peptide precursor C                                                                                                      |
| Nup205                            | NM_001108620 | 0.77 | -53  | 10854494 | nucleoporin 205                                                                                                                      |
| Oscp1                             | NM_001029923 | 0.59 | -67  | 10871984 | organic solute carrier partner 1                                                                                                     |
| Pdhb                              | NM_001007620 | 0.83 | -156 | 10779485 | pyruvate dehydrogenase (lipoamide) beta                                                                                              |
| Pdia6                             | NM_001004442 | 0.79 | -189 | 10892859 | protein disulfide isomerase family A, member 6                                                                                       |
| Pggt1b                            | NM_031082    | 1.53 | 119  | 10804361 | protein geranylgeranyltransferase type I, beta subunit                                                                               |
| Pgp                               | NM_001169152 | 0.81 | -99  | 10732076 | phosphoglycolate phosphatase                                                                                                         |
| Pigw                              | NM_194461    | 1.29 | 45   | 10745782 | phosphatidylinositol glycan anchor biosynthesis, class W                                                                             |
| Pla2g6                            | NM_001005560 | 0.80 | -20  | 10905406 | phospholipase A2, group VI (cytosolic, calcium-independent)                                                                          |
| Plcl1                             | NM_053456    | 1.39 | 15   | 10923361 | phospholipase C-like 1                                                                                                               |
| Pnpla2                            | NM_001108509 | 0.82 | -45  | 10712317 | patatin-like phospholipase domain containing 2                                                                                       |
| Ppih                              | XM_345576    | 0.83 | -55  | 10871582 | peptidylprolyl isomerase H (cyclophilin H)                                                                                           |
| Ppwd1                             | NM_001106406 | 1.73 | 87   | 10821149 | peptidylprolyl isomerase domain and WD repeat containing 1                                                                           |
| RGD1306402                        | BC093611     | 1.21 | 43   | 10774577 | pseudouridylate synthase 10                                                                                                          |
| Qsox2                             | NM_001109434 | 0.74 | -68  | 10843664 | quiescin Q6 sulfhydryl oxidase 2                                                                                                     |
| Slc25a36                          | XP_576451    | 1.33 | 428  | 10919433 | solute carrier family 25, member 36                                                                                                  |
| Slc25a40                          | NM_001037186 | 1.32 | 36   | 10853292 | solute carrier family 25, member 40                                                                                                  |
| Slc26a5                           | NM_030840    | 0.57 | -21  | 10853091 | solute carrier family 26, member 5 (prestin)                                                                                         |
| Slc38a7                           | NM_001003705 | 0.82 | -17  | 10805802 | solute carrier family 38, member 7                                                                                                   |
| Thns1                             | NM_001025035 | 0.71 | -19  | 10796696 | threonine synthase-like 1 ( <i>S. cerevisiae</i> )                                                                                   |
| Tmed5                             | NM_001007619 | 1.45 | 21   | 10771004 | transmembrane emp24 protein transport domain containing 5                                                                            |
| Tomm7                             | NM_001135174 | 0.72 | -264 | 10852964 | translocase of outer mitochondrial membrane 7 homolog (yeast)                                                                        |
| Trappc4                           | NM_001003708 | 0.71 | -97  | 10916785 | trafficking protein particle complex 4                                                                                               |

|                                         |              |      |      |          |                                                                                                     |
|-----------------------------------------|--------------|------|------|----------|-----------------------------------------------------------------------------------------------------|
| Ugp2                                    | NM_001024743 | 1.26 | 114  | 10778647 | UDP-glucose pyrophosphorylase 2                                                                     |
| Xpot                                    | NM_001108102 | 0.77 | -141 | 10902735 | exportin, tRNA (nuclear export receptor for tRNAs)                                                  |
| LOC687295                               | XM_001065015 | 0.77 | -60  | 10720161 | similar to translocase of inner mitochondrial membrane 50 homolog                                   |
| LOC685431                               | XR_086366    | 1.21 | 82   | 10937570 | similar to Alpha-enolase (2-phospho-D-glycerate hydro-lyase) (Non-neural enolase) (NNE) (Enolase 1) |
| <b>Proteolysis</b>                      |              |      |      |          |                                                                                                     |
| Adam10                                  | Z48444       | 1.48 | 278  | 10918545 | ADAM metallopeptidase domain 10                                                                     |
| Dcun1d1                                 | NM_001107668 | 1.43 | 184  | 10822792 | DCN1, defective in cullin neddylation 1, domain containing 1 (S. cerevisiae)                        |
| Prss47                                  | XM_001056923 | 0.78 | -11  | 10793409 | protease, serine, 47                                                                                |
| Mbtps2                                  | BC097391     | 1.21 | 39   | 10933634 | membrane-bound transcription factor peptidase, site 2                                               |
| Pcolce                                  | NM_019237    | 1.27 | 15   | 10760971 | procollagen C-endopeptidase enhancer                                                                |
| Psmb4                                   | NM_031629    | 0.78 | -266 | 10824884 | proteasome (prosome, macropain) subunit, beta type 4                                                |
| Psmb6                                   | NM_057099    | 0.77 | -44  | 10735244 | proteasome (prosome, macropain) subunit, beta type 6                                                |
| Psmd12                                  | NM_001005875 | 0.78 | -117 | 10739225 | proteasome (prosome, macropain) 26S subunit, non-ATPase, 12                                         |
| Psmd6                                   | NM_198730    | 0.80 | -154 | 10779357 | proteasome (prosome, macropain) 26S subunit, non-ATPase, 6                                          |
| Rbx1                                    | NM_001034135 | 0.79 | -122 | 10897912 | ring-box 1                                                                                          |
| Rnf111                                  | NM_001106836 | 1.25 | 56   | 10918519 | ring finger protein 111                                                                             |
| Rnf146                                  | BC083675     | 0.83 | -21  | 10702428 | ring finger protein 146                                                                             |
| Rnft1                                   | XM_340875    | 1.24 | 68   | 10737380 | ring finger protein, transmembrane 1                                                                |
| Uqcrcq                                  | NM_001025134 | 0.76 | -64  | 10742601 | ubiquinol-cytochrome c reductase, complex III subunit VII                                           |
| Usp33                                   | BC092624     | 1.39 | 186  | 10819790 | ubiquitin specific peptidase 33                                                                     |
| Vps45                                   | NM_172072    | 0.75 | -118 | 10825120 | vacuolar protein sorting 45 homolog (S. cerevisiae)                                                 |
| <b>Receptors &amp; Binding Proteins</b> |              |      |      |          |                                                                                                     |
| Abce1                                   | NM_001108446 | 1.27 | 101  | 10806960 | ATP-binding cassette, sub-family E (OABP), member 1                                                 |
| Efcab10                                 | NM_001108706 | 0.68 | -17  | 10884200 | EF-hand calcium binding domain 10                                                                   |
| Il13ra1                                 | NM_145789    | 1.54 | 19   | 10936365 | interleukin 13 receptor, alpha 1                                                                    |
| Ireb2                                   | NM_022863    | 1.32 | 126  | 10910094 | iron responsive element binding protein 2                                                           |
| M6prbp1                                 | XM_001061015 | 1.27 | 25   | 10930984 | mannose-6-phosphate receptor binding protein 1                                                      |
| Olr769                                  | NM_001000371 | 1.26 | 13   | 10848113 | olfactory receptor 769                                                                              |
| Oprs1                                   | NM_030996    | 0.77 | -33  | 10876185 | sigma non-opioid intracellular receptor 1                                                           |
| Plxdc2                                  | NM_001108422 | 1.56 | 16   | 10796564 | plexin domain containing 2                                                                          |
| Rora                                    | NM_001106834 | 1.37 | 40   | 10911250 | RAR-related orphan receptor alpha                                                                   |
| Sec61a2                                 | NM_001170343 | 0.73 | -357 | 10796280 | Sec61 alpha 2 subunit (S. cerevisiae)                                                               |
| Stxbp6                                  | XM_343057    | 1.38 | 15   | 10889772 | syntaxin binding protein 6 (amisyn)                                                                 |
| <b>Signaling</b>                        |              |      |      |          |                                                                                                     |
| Ak7                                     | NM_001108055 | 0.75 | -19  | 10886652 | adenylate kinase 7                                                                                  |
| Alcam                                   | NM_031753    | 1.94 | 110  | 10750878 | activated leukocyte cell adhesion molecule                                                          |
| Aurkc                                   | NM_001106221 | 1.23 | 13   | 10718658 | aurora kinase C                                                                                     |
| Calm3                                   | NM_012518    | 0.73 | -459 | 10719294 | calmodulin 3                                                                                        |
| Cdc42ep3                                | NM_001048044 | 0.74 | -50  | 10887939 | CDC42 effector protein (Rho GTPase binding) 3                                                       |
| Clk1                                    | NM_001106913 | 1.39 | 501  | 10928229 | CDC-like kinase 1                                                                                   |
| Cyr61                                   | NM_031327    | 1.53 | 204  | 10827231 | cysteine-rich, angiogenic inducer, 61                                                               |
| Dennd2c                                 | XM_001067655 | 1.30 | 25   | 10817959 | DENN/MADD domain containing 2C                                                                      |
| Drg1                                    | NM_001009685 | 0.72 | -270 | 10777918 | developmentally regulated GTP binding protein 1                                                     |
| Dusp10                                  | NM_001105734 | 1.57 | 11   | 10766463 | dual specificity phosphatase 10                                                                     |
| Efh2                                    | NM_001031648 | 1.24 | 225  | 10881211 | EF-hand domain family, member D2                                                                    |
| Ei24                                    | NM_001025660 | 0.77 | -118 | 10916144 | etoposide induced 2.4 mRNA                                                                          |
| Elmod3                                  | NM_001013087 | 0.75 | -20  | 10863246 | ELMO/CED-12 domain containing 3                                                                     |
| ErbB4                                   | NM_021687    | 1.41 | 92   | 10928636 | v-erb-a erythroblastic leukemia viral oncogene homolog 4 (avian)                                    |
| Fastkd2                                 | NM_001009673 | 1.21 | 46   | 10923904 | FAST kinase domains 2                                                                               |
| Fgd4                                    | NM_139263    | 1.36 | 32   | 10755875 | FYVE, RhoGEF and PH domain containing 4                                                             |
| Fkbp15                                  | XM_342846    | 1.25 | 32   | 10877380 | FK506 binding protein 15                                                                            |
| Gtpbp1                                  | NM_001130496 | 0.83 | -87  | 10897709 | GTP binding protein 1                                                                               |
| Hsp90aa1                                | NM_175761    | 1.56 | 2165 | 10892184 | heat shock protein 90, alpha (cytosolic), class A member 1                                          |
| Jak2                                    | NM_031514    | 1.38 | 93   | 10714667 | Janus kinase 2                                                                                      |
| Map2k4                                  | NM_001030023 | 1.21 | 162  | 10743668 | mitogen activated protein kinase kinase 4                                                           |
| Mapk7                                   | AJ005424     | 0.82 | -46  | 10743427 | mitogen-activated protein kinase 7                                                                  |
| Mapk8ip2                                | BC105884     | 0.62 | -22  | 10898606 | mitogen-activated protein kinase 8 interacting protein 2                                            |
| Narg2                                   | XM_001075498 | 1.48 | 49   | 10911270 | NMDA receptor regulated 2                                                                           |

|                      |              |      |      |          |                                                                                              |
|----------------------|--------------|------|------|----------|----------------------------------------------------------------------------------------------|
| Nek1                 | NM_001106082 | 1.37 | 63   | 10791421 | NIMA (never in mitosis gene a)-related expressed kinase 1                                    |
| Pde1a                | NM_030871    | 1.46 | 12   | 10846694 | phosphodiesterase 1A, calmodulin-dependent                                                   |
| Pih1d2               | XP_236221    | 1.50 | 30   | 10909886 | PIH1 domain containing 2                                                                     |
| Pik3ca               | NM_133399    | 1.22 | 53   | 10814726 | phosphoinositide-3-kinase, catalytic, alpha polypeptide                                      |
| Pik3r3               | NM_022213    | 0.82 | -42  | 10871229 | phosphoinositide-3-kinase, regulatory subunit 3 (gamma)                                      |
| Pim1                 | NM_017034    | 1.31 | 121  | 10828884 | pim-1 oncogene                                                                               |
| Plekha8              | NM_001109235 | 0.74 | -60  | 10855650 | pleckstrin homology domain containing, family A (phosphoinositide binding specific) member 8 |
| Pmaip1               | NM_001008385 | 1.39 | 16   | 10802375 | phorbol-12-myristate-13-acetate-induced protein 1                                            |
| Ppp1r11              | NM_212542    | 0.78 | -21  | 10827701 | protein phosphatase 1, regulatory (inhibitor) subunit 11                                     |
| Prkaa2               | NM_023991    | 1.21 | 28   | 10878416 | protein kinase, AMP-activated, alpha 2 catalytic subunit                                     |
| Prkdc                | NM_001108327 | 1.46 | 73   | 10755897 | protein kinase, DNA activated, catalytic polypeptide                                         |
| Ptprg                | NM_134356    | 1.26 | 18   | 10782609 | protein tyrosine phosphatase, receptor type, G                                               |
| Purg                 | XM_001068166 | 1.42 | 12   | 10792101 | purine-rich element binding protein G                                                        |
| Radil                | NM_001037218 | 0.68 | -22  | 10756853 | Ras association and DIL domains                                                              |
| Ranbp1               | NM_001108324 | 0.83 | -104 | 10751448 | RAN binding protein 1                                                                        |
| Rasl2-9              | NM_001166675 | 0.80 | -19  | 10703905 | RAS-like, family 2, locus 9                                                                  |
| Riok2                | NM_001009687 | 1.45 | 166  | 10703403 | RIO kinase 2 (yeast)                                                                         |
| Rock2                | NM_013022    | 1.73 | 128  | 10883726 | Rho-associated coiled-coil containing protein kinase 2                                       |
| Sipa1l1              | NM_139330    | 0.66 | -63  | 10885740 | signal-induced proliferation-associated 1 like 1                                             |
| Stk36                | NM_001173986 | 0.82 | -17  | 10924363 | serine/threonine kinase 36 (fused homolog, Drosophila)                                       |
| Tbc1d1               | XM_341215    | 0.75 | -68  | 10776915 | TBC1 domain family, member 1                                                                 |
| Tec                  | NM_053432    | 1.28 | 10   | 10772408 | tec protein tyrosine kinase                                                                  |
| RGD1560527           | XM_001055752 | 0.73 | -23  | 10797590 | similar to serine/threonine kinase                                                           |
| RGD1565493           | XM_002729803 | 1.40 | 53   | 10903286 | similar to DKFZP434I092 protein                                                              |
| <b>Transcription</b> |              |      |      |          |                                                                                              |
| Armcx3               | NM_001014273 | 1.30 | 213  | 10934967 | armadillo repeat containing, X-linked 3                                                      |
| Atf2                 | NM_031018    | 1.26 | 270  | 10846233 | activating transcription factor 2                                                            |
| Bin3                 | NM_001013186 | 0.78 | -61  | 10781344 | bridging integrator 3                                                                        |
| Brms1                | NM_001009605 | 0.80 | -91  | 10712978 | breast cancer metastasis-suppressor 1                                                        |
| C1d                  | NM_001106021 | 1.31 | 72   | 10774331 | nuclear DNA binding protein                                                                  |
| Casc5                | NM_001170594 | 1.28 | 45   | 10838733 | cancer susceptibility candidate 5                                                            |
| Ccdc42               | NM_001107009 | 0.59 | -33  | 10734761 | coiled-coil domain containing 42                                                             |
| Ccdc56               | NM_001109047 | 0.80 | -32  | 10747617 | coiled-coil domain containing 56                                                             |
| Ccdc59               | NM_001108090 | 1.37 | 34   | 10895268 | coiled-coil domain containing 59                                                             |
| Ccdc82               | NM_001007660 | 1.44 | 42   | 10907992 | coiled-coil domain containing 82                                                             |
| Cebpz                | NM_001108701 | 1.48 | 228  | 10887901 | CCAAT/enhancer binding protein zeta                                                          |
| Cnot3                | NM_001107471 | 0.82 | -40  | 10718520 | CCR4-NOT transcription complex, subunit 3                                                    |
| Dhx15                | XM_214053    | 1.26 | 271  | 10772967 | DEAH (Asp-Glu-Ala-His) box polypeptide 15                                                    |
| Dnaja1               | NM_022934    | 1.65 | 1058 | 10868289 | DnaJ (Hsp40) homolog, subfamily A, member 1                                                  |
| E2f5                 | U31668       | 0.65 | -47  | 10718609 | E2F transcription factor 5                                                                   |
| Elp2                 | NM_001034145 | 0.81 | -147 | 10800522 | elongation protein 2 homolog (S. cerevisiae)                                                 |
| Hif1a                | NM_024359    | 1.53 | 324  | 10885251 | hypoxia-inducible factor 1, alpha subunit (basic helix-loop-helix transcription factor)      |
| Htatsf1              | NM_001108259 | 1.69 | 99   | 10935589 | HIV-1 Tat specific factor 1                                                                  |
| Junb                 | NM_021836    | 1.23 | 161  | 10806585 | jun B proto-oncogene                                                                         |
| Klf4                 | NM_053713    | 1.48 | 123  | 10876838 | Kruppel-like factor 4 (gut)                                                                  |
| Klf5                 | NM_053394    | 1.48 | 17   | 10781829 | Kruppel-like factor 5                                                                        |
| Klhl9                | NM_001107944 | 1.44 | 340  | 10877984 | kelch-like 9 (Drosophila)                                                                    |
| Luzp1                | AF181259     | 1.57 | 33   | 10873012 | leucine zipper protein 1                                                                     |
| Mdm4                 | NM_001012026 | 1.20 | 182  | 10767663 | Mdm4 p53 binding protein homolog (mouse)                                                     |
| Med11                | NM_001105799 | 0.73 | -12  | 10735217 | mediator complex subunit 11                                                                  |
| Med13                | NM_001107035 | 1.27 | 168  | 10745897 | mediator complex subunit 13                                                                  |
| Mpp5                 | NM_001108034 | 1.45 | 109  | 10885500 | membrane protein, palmitoylated 5 (MAGUK p55 subfamily member 5)                             |
| Mum1                 | NM_001108736 | 0.71 | -50  | 10900554 | melanoma associated antigen (mutated) 1                                                      |
| Nol10                | NM_001014076 | 0.82 | -26  | 10883763 | nucleolar protein 10                                                                         |
| Npat                 | NM_001108147 | 1.52 | 76   | 10910015 | nuclear protein, ataxia-telangiectasia locus                                                 |
| Nsbp1                | NM_001134706 | 1.46 | 255  | 10707658 | nucleosomal binding protein 1                                                                |
| Plag1                | NM_001008316 | 1.55 | 11   | 10875282 | pleiomorphic adenoma gene 1                                                                  |
| Pole3                | NM_001007652 | 0.76 | -99  | 10905186 | polymerase (DNA directed), epsilon 3 (p17 subunit)                                           |

|                                               |              |             |             |          |                                                                                  |
|-----------------------------------------------|--------------|-------------|-------------|----------|----------------------------------------------------------------------------------|
| Polr2l-ps1                                    | XM_577644    | <b>0.74</b> | <b>-50</b>  | 10809086 | polymerase (RNA) II (DNA directed) polypeptide L, pseudogene 1                   |
| Rfc3                                          | NM_001009629 | <b>0.83</b> | <b>-22</b>  | 10759752 | replication factor C (activator 1) 3                                             |
| Rogdi                                         | NM_001024864 | <b>0.83</b> | <b>-24</b>  | 10731686 | rogdi homolog (Drosophila)                                                       |
| Sarnp                                         | NM_001033070 | <b>1.31</b> | <b>276</b>  | 10893247 | SAP domain containing ribonucleoprotein                                          |
| Taf1d                                         | NM_001014207 | <b>1.24</b> | <b>52</b>   | 10908089 | TATA box binding protein (TBP)-associated factor, RNA polymerase I, D, 41kDa     |
| Tbp                                           | NM_001004198 | <b>0.80</b> | <b>-83</b>  | 10703364 | TATA box binding protein                                                         |
| Tcea2                                         | NM_057098    | <b>0.67</b> | <b>-108</b> | 10843072 | transcription elongation factor A (SII), 2                                       |
| Ybx2                                          | NC_005109    | <b>0.65</b> | <b>-169</b> | 10735077 | Y box binding protein 2                                                          |
| Zbtb10                                        | NM_024489    | <b>1.27</b> | <b>151</b>  | 10822330 | zinc finger and BTB domain containing 10                                         |
| Zfp157                                        | XM_001057321 | <b>1.74</b> | <b>70</b>   | 10760768 | zinc finger protein 157                                                          |
| Zfp187                                        | XM_577579    | <b>1.65</b> | <b>109</b>  | 10795319 | zinc finger protein 187                                                          |
| Zfp217                                        | NM_001107813 | <b>0.75</b> | <b>-51</b>  | 10852050 | zinc finger protein 217                                                          |
| Zfp317                                        | NM_001134634 | <b>1.42</b> | <b>27</b>   | 10908182 | zinc finger protein 317                                                          |
| Zfp322a                                       | NM_001135084 | <b>1.89</b> | <b>83</b>   | 10795258 | zinc finger protein 322a                                                         |
| Zfp330                                        | NM_001108443 | <b>1.20</b> | <b>11</b>   | 10806886 | zinc finger protein 330                                                          |
| Zfp347                                        | AB047637     | <b>1.51</b> | <b>15</b>   | 10893431 | zinc finger protein 347                                                          |
| Zfx                                           | NM_001109017 | <b>1.73</b> | <b>139</b>  | 10938396 | zinc finger protein X-linked                                                     |
| Zmat2                                         | NM_001135582 | <b>0.78</b> | <b>-118</b> | 10801129 | zinc finger, matrin type 2                                                       |
| Znhit1                                        | XM_001076915 | <b>0.68</b> | <b>-34</b>  | 10761037 | zinc finger, HIT domain containing 1                                             |
| Znhit2                                        | NM_001107574 | <b>0.63</b> | <b>-61</b>  | 10713184 | zinc finger, HIT type 2                                                          |
| Crebzf                                        | NM_001106279 | <b>1.23</b> | <b>107</b>  | 10708616 | CREB/ATF bZIP transcription factor                                               |
| Tceanc                                        | NM_001109015 | <b>1.21</b> | <b>11</b>   | 10933362 | transcription elongation factor A (SII) N-terminal and central domain containing |
| LOC100125368                                  | NM_001139487 | <b>1.42</b> | <b>54</b>   | 10900136 | zinc finger protein LOC100125368                                                 |
| LOC685925                                     | XM_002725924 | <b>1.22</b> | <b>16</b>   | 10814162 | zinc finger protein 455-like                                                     |
| RGD1564061                                    | NM_001135782 | <b>0.70</b> | <b>-72</b>  | 10873801 | PRAME family member 8                                                            |
| RGD1308290                                    | NM_001047902 | <b>1.34</b> | <b>144</b>  | 10817202 | zinc finger CCCH-type containing 11A                                             |
| RGD1564807                                    | XM_225049    | <b>0.71</b> | <b>-11</b>  | 10793060 | similar to zinc finger protein, subfamily 1A, 5                                  |
| <b>Translation &amp; Protein Modification</b> |              |             |             |          |                                                                                  |
| Arl3                                          | NM_022700    | <b>0.68</b> | <b>-172</b> | 10730591 | ADP-ribosylation factor-like 3                                                   |
| Cct7                                          | NM_001106603 | <b>0.75</b> | <b>-176</b> | 10856884 | chaperonin containing Tcp1, subunit 7 (eta)                                      |
| Cwc22                                         | NM_001047959 | <b>1.43</b> | <b>45</b>   | 10885608 | CWC22 spliceosome-associated protein homolog (S. cerevisiae)                     |
| Dcp2                                          | NM_001170469 | <b>1.22</b> | <b>36</b>   | 10801494 | DCP2 decapping enzyme homolog (S. cerevisiae)                                    |
| Eef2k                                         | NM_012947    | <b>1.25</b> | <b>13</b>   | 10710494 | eukaryotic elongation factor-2 kinase                                            |
| Eif1ay                                        | NM_001106963 | <b>1.30</b> | <b>49</b>   | 10938019 | eukaryotic translation initiation factor 1A, Y-linked                            |
| Eif2b2                                        | NM_032058    | <b>0.73</b> | <b>-43</b>  | 10886014 | eukaryotic translation initiation factor 2B, subunit 2 beta                      |
| Eif2s2                                        | NM_199380    | <b>1.26</b> | <b>97</b>   | 10850970 | eukaryotic translation initiation factor 2, subunit 2 beta                       |
| Eif5a                                         | NM_001033681 | <b>0.82</b> | <b>-663</b> | 10744318 | eukaryotic translation initiation factor 5A                                      |
| Eif5a2                                        | NM_001100697 | <b>1.30</b> | <b>34</b>   | 10814644 | eukaryotic translation initiation factor 5A2                                     |
| Eif5b                                         | NM_001110141 | <b>1.56</b> | <b>147</b>  | 10703648 | eukaryotic translation initiation factor 5B                                      |
| Hnrnpa2b1                                     | NM_001104613 | <b>1.27</b> | <b>223</b>  | 10862522 | heterogeneous nuclear ribonucleoprotein A2/B1                                    |
| Lsm7                                          | NM_001108732 | <b>0.71</b> | <b>-27</b>  | 10893684 | LSM7 homolog, U6 small nuclear RNA associated (S. cerevisiae)                    |
| Mrpl22                                        | NM_001105781 | <b>0.79</b> | <b>-16</b>  | 10733782 | mitochondrial ribosomal protein L22                                              |
| Mrpl41                                        | NM_001013426 | <b>0.78</b> | <b>-29</b>  | 10911993 | mitochondrial ribosomal protein L41                                              |
| Mrpl54                                        | NM_001106770 | <b>0.75</b> | <b>-130</b> | 10893586 | mitochondrial ribosomal protein L54                                              |
| Mrps18c                                       | NM_001105996 | <b>0.67</b> | <b>-270</b> | 10775532 | mitochondrial ribosomal protein S18C                                             |
| Phax                                          | NM_173133    | <b>0.79</b> | <b>-22</b>  | 10801810 | phosphorylated adaptor for RNA export                                            |
| Prpf8                                         | BC099197     | <b>0.82</b> | <b>-146</b> | 10735897 | PRP8 pre-mRNA processing factor 8 homolog (S. cerevisiae)                        |
| Rbm17                                         | NM_001013058 | <b>0.83</b> | <b>-184</b> | 10796134 | RNA binding motif protein 17                                                     |
| Rpl27                                         | NM_022514    | <b>0.82</b> | <b>-105</b> | 10738409 | ribosomal protein L27                                                            |
| Rps4x                                         | NM_001007600 | <b>1.22</b> | <b>362</b>  | 10938722 | ribosomal protein S4, X-linked                                                   |
| Rps4y2                                        | NM_001109612 | <b>0.77</b> | <b>-73</b>  | 10859760 | ribosomal protein S4, Y-linked 2                                                 |
| Rpsud2                                        | NM_001135845 | <b>0.77</b> | <b>-10</b>  | 10838729 | RNA pseudouridylate synthase domain containing 2                                 |
| Srrm2                                         | XP_220207    | <b>1.22</b> | <b>224</b>  | 10731980 | serine/arginine repetitive matrix 2                                              |
| Taf5l                                         | NM_001107442 | <b>0.81</b> | <b>-18</b>  | 10703465 | TAF5-like RNA polymerase II, p300/CBP-associated factor (PCAF)-associated factor |
| Thoc7                                         | XM_001069423 | <b>0.70</b> | <b>-55</b>  | 10779368 | THO complex 7 homolog (Drosophila)                                               |
| Trove2                                        | NM_001107183 | <b>1.20</b> | <b>24</b>   | 10768323 | TROVE domain family, member 2                                                    |
| RGD1560949                                    | XM_001078650 | <b>0.73</b> | <b>-22</b>  | 10808338 | similar to testis nuclear RNA-binding protein-like                               |

|                                    |                 |      |      |          |                                                                                   |
|------------------------------------|-----------------|------|------|----------|-----------------------------------------------------------------------------------|
| LOC681258                          | ENSRNOT0000005  | 1.26 | 137  | 10899204 | similar to La-related protein 4 (La ribonucleoprotein domain family member 4)     |
| <b>Miscellaneous &amp; Unknown</b> |                 |      |      |          |                                                                                   |
| Bxdc2                              | NM_001029915    | 1.39 | 90   | 10821914 | brix domain containing 2                                                          |
| Dph3                               | NM_001134850    | 0.71 | -77  | 10790305 | DPH3, KTI11 homolog (S. cerevisiae)                                               |
| Fam164a                            | BC168976        | 1.36 | 23   | 10822377 | family with sequence similarity 164, member A                                     |
| Fam169a                            | XM_226706       | 1.32 | 196  | 10812656 | family with sequence similarity 169, member A                                     |
| Hiatl1                             | NM_001107334    | 1.26 | 50   | 10793397 | hippocampus abundant transcript-like 1                                            |
| Ift122                             | BC087667        | 0.76 | -80  | 10858038 | intraflagellar transport 122 homolog (Chlamydomonas)                              |
| Ift57                              | NM_001107093    | 0.72 | -85  | 10753784 | intraflagellar transport 57 homolog (Chlamydomonas)                               |
| Lsmd1                              | NM_001105794    | 0.78 | -47  | 10708152 | LSM domain containing 1                                                           |
| Nipsnap3a                          | NM_001009422    | 1.33 | 13   | 10869094 | nipsnap homolog 3B (C. elegans)                                                   |
| Otud1                              | XM_574086       | 0.80 | -13  | 10796673 | OTU domain containing 1                                                           |
| Tmem134                            | NM_001078647    | 0.80 | -84  | 10712816 | transmembrane protein 134                                                         |
| Tmem9                              | NM_001105953    | 0.78 | -23  | 10764260 | transmembrane protein 9                                                           |
| Trim52                             | NM_001106056    | 0.83 | -50  | 10781956 | tripartite motif-containing 52                                                    |
| Wdr31                              | NM_001011976    | 0.67 | -91  | 10877418 | WD repeat domain 31                                                               |
| Wdr35l                             | NM_001099340    | 0.77 | -130 | 10883557 | WD repeat domain 35-like                                                          |
| Wdr45                              | NM_001013958    | 1.27 | 28   | 10937064 | WD repeat domain 45                                                               |
| Wdr51a                             | NM_001109296    | 0.80 | -12  | 10912826 | WD repeat domain 51A                                                              |
| Wdr53                              | NM_001109055    | 0.75 | -11  | 10754862 | WD repeat domain 53                                                               |
| Wdr66                              | XM_222180       | 0.59 | -35  | 10761921 | WD repeat domain 66                                                               |
| Dip2c                              | NM_001107360    | 0.81 | -45  | 10799158 | DIP2 disco-interacting protein 2 homolog C (Drosophila)                           |
| LOC362855                          | BC078924        | 0.80 | -67  | 10895581 | P55                                                                               |
| Ptges3l1                           | BC087125        | 1.65 | 20   | 10938126 | prostaglandin E synthase 3-like 1                                                 |
| Rsrc2                              | NM_001014128    | 1.51 | 143  | 10758354 | arginine/serine-rich coiled-coil 2                                                |
| Tmem107                            | NM_001109648    | 0.59 | -66  | 10734866 | transmembrane protein 107                                                         |
| Tmem181                            | BC168231        | 0.78 | -41  | 10702880 | transmembrane protein 181                                                         |
| LOC500034                          | NM_001109221    | 1.40 | 132  | 10861117 | similar to CG3570-PA                                                              |
| LOC680262                          | XM_001056376    | 0.64 | -45  | 10916073 | hypothetical protein LOC680262                                                    |
| LOC686050                          | XM_001066348    | 1.27 | 42   | 10877141 | hypothetical protein LOC686050                                                    |
| LOC686661                          | XM_001075174    | 1.32 | 13   | 10742868 | similar to CG1998-PA                                                              |
| LOC688211                          | XM_001062937    | 1.24 | 70   | 10747891 | hypothetical protein LOC685233                                                    |
| RGD1563106                         | NM_001107010    | 0.80 | -128 | 10734830 | similar to novel protein                                                          |
| RGD1563422                         | NM_001077643    | 0.73 | -54  | 10765293 | similar to Brain protein 44                                                       |
| RGD1305899                         | XM_001058977    | 0.60 | -102 | 10852385 | similar to Protein C20orf158                                                      |
| RGD1307051                         | NM_001108091    | 1.65 | 27   | 10902112 | similar to hypothetical protein FLJ21963                                          |
| RGD1309540                         | NM_001013918    | 0.77 | -69  | 10847375 | similar to hypothetical protein MGC40841; similar to hypothetical protein MGC4707 |
| RGD1309995                         | XM_235003       | 1.22 | 67   | 10901367 | similar to CG13957-PA                                                             |
| RGD1559496                         | NM_001106199    | 0.69 | -164 | 10808874 | similar to hypothetical protein                                                   |
| <b>EST's</b>                       |                 |      |      |          |                                                                                   |
| LOC100302465                       | BC167765        | 0.71 | -18  | 10726394 | hypothetical LOC100302465                                                         |
| RGD1306936                         | NM_001106593    | 0.82 | -47  | 10855462 | similar to chromosome 7 open reading frame 30                                     |
| RGD1307947                         | NM_001014083    | 1.39 | 21   | 10902039 | similar to RIKEN cDNA C430008C19                                                  |
| RGD1564093                         | NM_001105946    | 0.82 | -134 | 10809993 | similar to RIKEN cDNA 2310036O22                                                  |
| RGD1564792                         | XM_580041       | 1.29 | 17   | 10853002 | RGD1564792                                                                        |
| RGD1565975                         | XM_001065138    | 0.75 | -32  | 10806246 | RGD1565975                                                                        |
|                                    | BC089062        | 1.64 | 31   | 10877751 |                                                                                   |
|                                    | BC090353        | 1.63 | 1134 | 10728028 |                                                                                   |
|                                    | ENSRNOT00000000 | 0.77 | -14  | 10926153 |                                                                                   |
|                                    | ENSRNOT00000000 | 0.67 | -11  | 10759597 |                                                                                   |
|                                    | ENSRNOT00000000 | 1.47 | 56   | 10935456 |                                                                                   |
|                                    | ENSRNOT00000001 | 0.64 | -25  | 10849614 |                                                                                   |
|                                    | ENSRNOT00000002 | 1.38 | 57   | 10846151 |                                                                                   |
|                                    | ENSRNOT00000002 | 0.71 | -16  | 10706637 |                                                                                   |
|                                    | ENSRNOT00000002 | 0.75 | -58  | 10713084 |                                                                                   |
|                                    | ENSRNOT00000003 | 0.74 | -24  | 10840394 |                                                                                   |
|                                    | ENSRNOT00000003 | 1.39 | 40   | 10937839 |                                                                                   |
|                                    | ENSRNOT00000003 | 1.33 | 265  | 10928916 |                                                                                   |

|  |                |             |             |          |  |
|--|----------------|-------------|-------------|----------|--|
|  | ENSRNOT0000004 | <b>1.20</b> | <b>16</b>   | 10804402 |  |
|  | ENSRNOT0000004 | <b>0.78</b> | <b>-24</b>  | 10924505 |  |
|  | ENSRNOT0000004 | <b>1.46</b> | <b>66</b>   | 10812903 |  |
|  | ENSRNOT0000004 | <b>1.58</b> | <b>41</b>   | 10731222 |  |
|  | ENSRNOT0000005 | <b>1.70</b> | <b>154</b>  | 10939958 |  |
|  | ENSRNOT0000005 | <b>1.35</b> | <b>23</b>   | 10935150 |  |
|  | ENSRNOT0000005 | <b>1.21</b> | <b>34</b>   | 10910766 |  |
|  | ENSRNOT0000005 | <b>0.55</b> | <b>-134</b> | 10801135 |  |
|  | ENSRNOT0000005 | <b>1.25</b> | <b>15</b>   | 10829163 |  |
|  | ENSRNOT0000005 | <b>1.34</b> | <b>14</b>   | 10744141 |  |
|  | ENSRNOT0000005 | <b>1.22</b> | <b>18</b>   | 10834600 |  |
|  | ENSRNOT0000005 | <b>0.78</b> | <b>-19</b>  | 10702714 |  |
|  | ENSRNOT0000005 | <b>0.78</b> | <b>-19</b>  | 10915105 |  |
|  | ENSRNOT0000005 | <b>0.78</b> | <b>-45</b>  | 10842742 |  |
|  | ENSRNOT0000005 | <b>1.27</b> | <b>80</b>   | 10824548 |  |
|  | ENSRNOT0000005 | <b>0.72</b> | <b>-59</b>  | 10938887 |  |
|  | ENSRNOT0000006 | <b>1.57</b> | <b>97</b>   | 10775624 |  |
|  | ENSRNOT0000006 | <b>1.37</b> | <b>25</b>   | 10869549 |  |
|  | ENSRNOT0000007 | <b>1.30</b> | <b>40</b>   | 10834604 |  |
|  | ENSRNOT0000007 | <b>0.73</b> | <b>-15</b>  | 10934821 |  |
|  | FQ222240       | <b>1.58</b> | <b>85</b>   | 10714078 |  |
|  | FQ222682       | <b>0.77</b> | <b>-82</b>  | 10722718 |  |
|  | FQ224515       | <b>1.50</b> | <b>46</b>   | 10823593 |  |
|  | GENSCAN0000001 | <b>1.34</b> | <b>15</b>   | 10875696 |  |
|  | GENSCAN0000003 | <b>0.65</b> | <b>-49</b>  | 10807923 |  |
|  | NC_001665      | <b>0.82</b> | <b>-30</b>  | 10930608 |  |
|  | NR_031856      | <b>1.83</b> | <b>59</b>   | 10749975 |  |
|  | ---            | <b>1.29</b> | <b>13</b>   | 10866408 |  |
|  | ---            | <b>0.80</b> | <b>-11</b>  | 10872885 |  |
|  | ---            | <b>0.80</b> | <b>-32</b>  | 10864838 |  |
|  | ---            | <b>0.63</b> | <b>-15</b>  | 10921621 |  |
|  | ---            | <b>0.77</b> | <b>-13</b>  | 10755627 |  |
|  | ---            | <b>1.27</b> | <b>38</b>   | 10905770 |  |
|  | ---            | <b>1.65</b> | <b>22</b>   | 10791419 |  |
|  | ---            | <b>1.65</b> | <b>31</b>   | 10911847 |  |
