# Supplementary material for: Environmentally Induced Epigenetic Transgenerational Inheritance of Altered Sertoli Cell Transcriptome and Epigenome: Molecular Etiology of Male Infertility
Source: PubMed Central journal article supplement (PMC3610698; doi:10.1371/journal.pone.0059922), 2013-03-28
Supplement: pone.0059922.s005.pdf [file pone.0059922.s005.pdf]

**Supplemental Table S2. Differential DNA methylation regions (DMR) in F3 generation vinclozolin lineage Sertoli cells**

| Gene symbol         | Description                                                            | RGD ID  | Entrez gene ID | p value  | Changed region coordinates |           |           |
|---------------------|------------------------------------------------------------------------|---------|----------------|----------|----------------------------|-----------|-----------|
|                     |                                                                        |         |                |          | Chr                        | Start     | End       |
| Abcf3               | ATP-binding cassette, subfamily F (GCN20), member 3                    | 1310468 | 287982         | 5.12E-12 | 11                         | 82581404  | 82582483  |
| Acox1               | Acyl-CoA oxidase-like                                                  | 1306814 | 296138         | 1.44E-16 | 3                          | 115365654 | 115366254 |
| Amigo2              | Adhesion molecule with Ig like domain 2                                | 727911  | 300186         | 7.67E-27 | 7                          | 135969017 | 135969617 |
| Angptl4             | Angiopoietin-like 4                                                    | 735058  | 362850         | 1.98E-18 | 7                          | 16267607  | 16268546  |
| Antxr1              | Anthrax toxin receptor 1                                               | 1307144 | 362393         | 1.80E-30 | 4                          | 121483647 | 121484678 |
| Armcx2              | Armadillo repeat containing, X-linked 2                                | 1359132 | 367903         | 5.74E-35 | X                          | 122265349 | 122266237 |
| Atp6v0b             | ATPase, H+ transporting, lysosomal V0 subunit B                        | 1308303 | 298451         | 1.92E-09 | 5                          | 138350342 | 138351447 |
| Bat2l               | Proline-rich coiled-coil 2B                                            | 1595906 | 296637         | 3.72E-21 | 3                          | 11290691  | 11291386  |
| Calca               | Calcitonin-related polypeptide alpha                                   | 2254    | 24241          | 6.29E-13 | 1                          | 172690139 | 172691239 |
| Ccdc17              | Coiled-coil domain containing 17                                       | 1598211 | 500528         | 2.36E-17 | 5                          | 136879913 | 136881400 |
| Ceacam6             | Carcinoembryonic antigen-related cell adhesion molecule 6              | 1642421 | 100125369      | 1.08E-17 | 1                          | 80107471  | 80108071  |
| Cox8b               | Cytochrome c oxidase, subunit VIIIb                                    | 2386    | 25250          | 1.38E-16 | 1                          | 201058346 | 201059031 |
| Csrnp1              | Cysteine-serine-rich nuclear protein 1                                 | 1305999 | 363165         | 9.95E-10 | 8                          | 124938760 | 124939874 |
| Cyp4f5              | Cytochrome P450, family 4, subfamily f, polypeptide 5                  | 708364  | 286905         | 1.78E-22 | 7                          | 13119902  | 13120699  |
| Dctn2               | Dynactin 2                                                             | 1303182 | 299850         | 1.05E-23 | 7                          | 67223573  | 67224293  |
| Dll3                | Delta-like 3 (Drosophila)                                              | 70953   | 114125         | 1.19E-15 | 1                          | 83381756  | 83383501  |
| Dnd1                | Dead end homolog 1 (zebrafish)                                         | 1583648 | 679841         | 1.40E-16 | 18                         | 29465951  | 29466771  |
| Ebf3                | Early B-cell factor 3                                                  | 1304956 | 361668         | 6.71E-15 | 1                          | 196931754 | 196932859 |
| Emilin1             | Elastin microfibril interfacier 1                                      | 1311209 | 298845         | 1.98E-08 | 6                          | 25440952  | 25442052  |
| Esrp2               | Epithelial splicing regulatory protein 2                               | 1310855 | 307810         | 2.19E-13 | 19                         | 35989148  | 35990238  |
| Fech                | Ferrochelatase                                                         | 1307556 | 361338         | 2.56E-08 | 18                         | 60708474  | 60709288  |
| G6b                 | G6b protein                                                            | 1303269 | 406865         | 2.76E-17 | 20                         | 3822418   | 3823018   |
| Gabarapl1           | GABA(A) receptor-associated protein like 1                             | 1596143 | 689161         | 1.39E-16 | 4                          | 166802302 | 166803201 |
| Gad2                | Glutamate decarboxylase 2                                              | 2653    | 24380          | 1.23E-18 | 17                         | 96258803  | 96259502  |
| Gas6                | Growth arrest specific 6                                               | 61913   | 58935          | 5.79E-12 | 16                         | 80896103  | 80897214  |
| Gene id Chr1_1386.1 | Predicted gene                                                         | NA      | NA             | 5.55E-23 | 1                          | 93660805  | 93661590  |
| Gene id Chr19_655.1 | Predicted gene                                                         | NA      | NA             | 5.98E-36 | 19                         | 41441292  | 41442411  |
| Gene id Chr7_1541.1 | Predicted gene                                                         | NA      | NA             | 3.26E-25 | 7                          | 114997310 | 114998010 |
| Giyd2               | SLX1 structure-specific endonuclease subunit homolog B (S. cerevisiae) | 1311568 | 293489         | 1.00E-31 | 1                          | 185849341 | 185850026 |
| Gng8                | Guanine nucleotide binding protein (G protein), gamma 8                | 620808  | 245986         | 1.15E-20 | 1                          | 77218978  | 77219578  |
| Gp1bb               | Glycoprotein Ib (platelet), beta polypeptide                           | 621050  | 116727         | 9.67E-10 | 11                         | 84368047  | 84368937  |
| Gzmb                | Granzyme B                                                             | 620018  | 171528         | 3.87E-08 | 15                         | 35201955  | 35202555  |
| Hdc                 | Histidine decarboxylase                                                | 2790    | 24443          | 1.02E-15 | 3                          | 114138885 | 114139770 |
| Higd2a              | HIG1 hypoxia inducible domain family, member 2A                        | 1309691 | 290999         | 4.24E-13 | 17                         | 16084041  | 16084831  |
| Iffo2               | Intermediate filament family orphan 2                                  | 1624207 | 641315         | 2.52E-11 | 5                          | 158403134 | 158403944 |
| Il22ra2             | Il22ra2 interleukin 22 receptor, alpha 2                               | 1303169 | 44986          | 2.13E-15 | 1                          | 14875559  | 14876159  |
| Ilvbl               | ilvB (bacterial acetolactate synthase)-like                            | 1307988 | 362843         | 1.65E-09 | 7                          | 12602409  | 12603404  |
| Isg20l2             | Interferon stimulated exonuclease gene 20-like 2                       | 1359413 | 361977         | 1.18E-16 | 2                          | 180008944 | 180009544 |
| Kb15                | Type II keratin Kb15                                                   | 1565564 | 366992         | 9.64E-08 | 7                          | 140318073 | 140318965 |
| Kctd11              | Potassium channel tetramerisation domain containing 11                 | 1307125 | 363634         | 3.37E-13 | 10                         | 56726062  | 56726846  |
| Klhl17              | Kelch-like 17 (Drosophila)                                             | 708444  | 246757         | 1.15E-22 | 5                          | 173066362 | 173067163 |
| Krt83               | Keratin 83                                                             | 1583565 | 681126         | 5.05E-11 | 7                          | 140185564 | 140186164 |
| Krt84               | Keratin 84                                                             | 1359402 | 315320         | 6.63E-13 | 7                          | 140287213 | 140287908 |
| Lhx8                | LIM homeobox 8                                                         | 1308749 | 365963         | 6.55E-10 | 2                          | 252237969 | 252238667 |
| Lss                 | Lanosterol synthase (2,3-oxidosqualene-lanosterol cyclase)             | 620955  | 81681          | 1.41E-08 | 20                         | 12533754  | 12534464  |
| Med6                | Mediator complex subunit 6                                             | 1310296 | 299180         | 1.09E-19 | 6                          | 105446090 | 105446990 |
| Mlf2                | Myeloid leukemia factor 2                                              | 1306294 | 312709         | 2.46E-11 | 4                          | 161059133 | 161059932 |
| Mt2A                | Metallothionein 2A                                                     | 1592345 | 689415         | 2.25E-14 | 19                         | 11268060  | 11268760  |
| Mta1                | Metastasis associated 1                                                | 621018  | 64520          | 1.94E-15 | 6                          | 137660231 | 137661023 |
| Nanos3              | nanos homolog 3 (Drosophila)                                           | 1306672 | 288909         | 7.42E-08 | 19                         | 25668935  | 25669840  |
| Npc2                | Niemann-Pick disease, type C2                                          | 628756  | 286898         | 1.69E-13 | 6                          | 108814526 | 108815606 |
| NSCAN Chr7.521.a    | Predicted gene                                                         | NA      | NA             | 3.28E-16 | 7                          | 54504179  | 54505054  |
| NSCAN ChrX.046.a    | Predicted gene                                                         | NA      | NA             | 2.35E-14 | X                          | 7961753   | 7962558   |
| Olr1584             | Olfactory receptor 1584                                                | 1334087 | 289247         | 9.56E-15 | 13                         | 89782014  | 89782792  |
| Olr40               | Olfactory receptor 40                                                  | 1334204 | 293197         | 3.72E-11 | 1                          | 160090933 | 160092343 |
| Olr425              | Olfactory receptor 425                                                 | 1333333 | 296687         | 3.09E-16 | 3                          | 16610649  | 16611459  |
| Pcdha13             | Pcdha13 protocadherin alpha 13                                         | 620751  | 116742         | 3.56E-12 | 18                         | 29747775  | 29748375  |
| Pcyox1              | Prenylcysteine oxidase 1                                               | 628652  | 246302         | 2.29E-15 | 4                          | 120579932 | 120580828 |
| Peli1               | Pellino 1                                                              | 1311199 | 305549         | 1.26E-12 | 14                         | 101869844 | 101870444 |
| Phox2a              | Paired-like homeobox 2a                                                | 621323  | 116648         | 7.54E-10 | 1                          | 159271967 | 159272872 |
| Pole3               | Polymerase (DNA directed), epsilon 3 (p17 subunit)                     | 1359475 | 298098         | 2.77E-15 | 5                          | 79520269  | 79520987  |
| Pou4f2              | POU class 4 homeobox 2                                                 | 620075  | 171355         | 8.43E-31 | 19                         | 31389541  | 31390235  |
| Prdx5               | Peroxisredoxin 5                                                       | 71007   | 113898         | 1.25E-18 | 1                          | 209585932 | 209587138 |

|            |                                                                                                         |         |           |          |    |           |           |
|------------|---------------------------------------------------------------------------------------------------------|---------|-----------|----------|----|-----------|-----------|
| Prickle3   | Prickle homolog 3 ( <i>Drosophila</i> )                                                                 | 1359685 | 317380    | 1.95E-11 | X  | 26890034  | 26890634  |
| R3hdm2     | R3H domain containing 2                                                                                 | 1310066 | 362894    | 1.89E-09 | 7  | 67361803  | 67362403  |
| Rbm25      | RNA binding motif protein 25                                                                            | 1308755 | 366693    | 2.05E-09 | 6  | 107586368 | 107587434 |
| RGD1305537 | Similar to RIKEN cDNA 3110001122                                                                        | 1305537 | 363528    | 1.60E-10 | 10 | 1787843   | 1788626   |
| RGD1562673 | Similar to Prostatic spermine-binding protein precursor (SBP)                                           | 1562673 | 363551    | 3.63E-08 | 10 | 13203365  | 13203965  |
| Rnasek     | Rnasek ribonuclease, RNase K                                                                            | 1305687 | 287453    | 2.15E-23 | 10 | 57077341  | 57078238  |
| Rnf5       | Ring finger protein 5                                                                                   | 1588458 | 407784    | 5.15E-11 | 20 | 4247105   | 4248855   |
| Rpl30      | Ribosomal protein L30                                                                                   | 621201  | 64640     | 5.15E-13 | 7  | 69889253  | 69890539  |
| Rpl38      | Ribosomal protein L38                                                                                   | 1305573 | 689284    | 2.65E-51 | 10 | 104544737 | 104546121 |
| Rpl41      | Ribosomal protein L41                                                                                   | 621210  | 124440    | 3.96E-20 | 7  | 1839514   | 1840666   |
| RT1-M6-2   | RT1 class I, locus M6, gene 2                                                                           | 1595815 | 365527    | 4.58E-12 | 20 | 1675848   | 1676448   |
| Scyl1      | SCY1-like 1 ( <i>S. cerevisiae</i> )                                                                    | 1307330 | 293684    | 8.71E-08 | 1  | 208359148 | 208359748 |
| Sfrp2      | Secreted frizzled-related protein 2                                                                     | 735163  | 310552    | 1.36E-15 | 2  | 175477883 | 175479265 |
| Slc10a4    | Solute carrier family 10 (sodium/bile acid cotransporter family), member 4                              | 1309536 | 305309    | 1.81E-17 | 14 | 37607465  | 37608065  |
| Slc15a3    | Solute carrier family 15, member 3                                                                      | 628663  | 246239    | 1.24E-10 | 1  | 213340695 | 213341500 |
| Slc1a1     | Solute carrier family 1 (neuronal/epithelial high affinity glutamate transporter, system Xag), member 1 | 3696    | 25550     | 8.08E-23 | 1  | 232487078 | 232487865 |
| Slc35a2    | Solute carrier family 35 (UDP-galactose transporter), member A2                                         | 2293497 | 100158233 | 2.17E-09 | X  | 26650501  | 26651200  |
| Slc5a5     | Solute carrier family 5 (sodium iodide symporter), member 5                                             | 69267   | 114613    | 9.85E-09 | 16 | 19042786  | 19044400  |
| Sms        | Spermine synthase                                                                                       | 1564826 | 363469    | 8.72E-11 | X  | 58816696  | 58817492  |
| Spata2     | Spata2 spermatogenesis associated 2                                                                     | 620754  | 114210    | 1.62E-17 | 3  | 158640784 | 158641479 |
| Spr        | Sepiapterin reductase (7,8-dihydrobiopterin:NADP+ oxidoreductase)                                       | 3753    | 29270     | 1.15E-23 | 4  | 119372067 | 119372906 |
| Stt3a      | STT3, subunit of the oligosaccharyltransferase complex, homolog A ( <i>S. cerevisiae</i> )              | 1565793 | 500972    | 4.40E-11 | 8  | 38016244  | 38017123  |
| Supt16h    | Suppressor of Ty 16 homolog ( <i>S. cerevisiae</i> )                                                    | 1310032 | 305851    | 8.87E-11 | 15 | 27642060  | 27643789  |
| Tmem119    | Transmembrane protein 119                                                                               | 1307573 | 304581    | 3.82E-18 | 12 | 43859955  | 43860555  |
| Tmem72     | Transmembrane protein 72                                                                                | 1308850 | 362424    | 3.82E-09 | 4  | 153065628 | 153066228 |
| Tomm40b    | Translocase of outer mitochondrial membrane 40 homolog B (yeast)                                        | 1562006 | 304971    | 1.07E-20 | 13 | 87111902  | 87112902  |
| Tpra1      | Transmembrane protein, adipocyte associated 1                                                           | 620858  | 85494     | 5.37E-26 | 4  | 122999670 | 123001095 |
| Trpv4      | Transient receptor potential cation channel, subfamily V, member 4                                      | 69337   | 66026     | 1.20E-22 | 12 | 43224793  | 43225577  |
| Tsku       | Tsukushi small leucine rich proteoglycan homolog ( <i>Xenopus laevis</i> )                              | 1359311 | 308843    | 5.35E-30 | 1  | 155621758 | 155622558 |
| Tyro3      | TYRO3 protein tyrosine kinase                                                                           | 3923    | 25232     | 6.28E-11 | 3  | 106309762 | 106310557 |
| Ubb        | Ubiquitin B                                                                                             | 621562  | 192255    | 1.33E-21 | 10 | 48738155  | 48738755  |
| Vamp1      | Vesicle-associated membrane protein 1                                                                   | 3948    | 25624     | 1.57E-17 | 4  | 161331679 | 161332357 |
| Vcl        | Vinculin                                                                                                | 1311217 | 305679    | 1.04E-24 | 15 | 3575689   | 3576789   |
| Vwa1       | Von Willebrand factor A domain containing 1                                                             | 1311476 | 298683    | 6.24E-14 | 5  | 172632883 | 172633678 |
| Wdr13      | WD repeat domain 13                                                                                     | 1560982 | 317370    | 1.89E-10 | X  | 26393965  | 26394646  |
| Zbtb16     | Zinc finger and BTB domain containing 16                                                                | 727921  | 353227    | 2.32E-07 | 8  | 52095606  | 52096206  |

Regions showing vinclozolin-induced transgenerational change with MeDIP-Chip analysis of F3 generation Sertoli cells
