# Supplementary material for: Environmentally Induced Epigenetic Transgenerational Inheritance of Altered Sertoli Cell Transcriptome and Epigenome: Molecular Etiology of Male Infertility
Source: PubMed Central journal article supplement (PMC3610698; doi:10.1371/journal.pone.0059922), 2013-03-28
Supplement: pone.0059922.s006.pdf [file pone.0059922.s006.pdf]

Supplementary Table S3.

| PROPOSED INTERACTION                 | DMR CHANGED                          | DMR LOCATION REGARDING EXPRESSION CHANGES        | DIFFERENTIALLY EXPRESSED GENES RELATED TO DMR                                                                                                                                  |
|--------------------------------------|--------------------------------------|--------------------------------------------------|--------------------------------------------------------------------------------------------------------------------------------------------------------------------------------|
| DIRECT REGULATION                    | Prdx5                                | is same gene as                                  | Prdx5                                                                                                                                                                          |
|                                      | Pole3                                | is same gene as                                  | Pole3                                                                                                                                                                          |
| <i>Total regions</i>                 | <b>2 DMR</b>                         |                                                  | <b>2 regions (in 2 genes) changed in gene expression</b>                                                                                                                       |
| CLUSTER REGULATION                   | Scyl1                                | is inside cluster                                | Tmem134, Brms1, Gene id Chr1_3166.1 (possibly Rnaseh2c), mRNA BC090353 (possibly Malat1), Znhit2, Prdx5                                                                        |
|                                      | Prdx5                                | is inside cluster                                |                                                                                                                                                                                |
|                                      | RGD1562673                           | is inside cluster                                | Srrm2, Pgp, Hagh                                                                                                                                                               |
|                                      | Ubb                                  | is within 2MB from cluster                       | Lrrc48, Mapk7, B9d1                                                                                                                                                            |
|                                      | Kctd11                               | is inside cluster                                | Ccdc42, Odf4, RGD1563106, Tmem107, Dnah2, Eif4a1, Eif5a, Ybx2, Med11, Psmb6, Rpain                                                                                             |
|                                      | Rnasek                               | is inside cluster                                |                                                                                                                                                                                |
|                                      | Nanos3                               | is inside cluster                                | RGD1564093, Junb, Syce2, Asf1b                                                                                                                                                 |
|                                      | Gene id Chr19_655.1 (possibly Wrd59) | is inside cluster                                | EST CR464641 (possibly Hydin), Gene id Chr19_634.1 (possibly Hydin - region 1), Gene id Chr19_634.1 (possibly Hydin -region 2), Gene id Chr19_634.1 (possibly Hydin -region 3) |
|                                      | Pole3                                | is inside cluster                                |                                                                                                                                                                                |
|                                      | Ccdc17                               | is inside cluster                                | Fkbp15, Wdr31, Bspry, Atp6v1g1                                                                                                                                                 |
|                                      | Atp6v0b                              | is within 2MB from cluster                       | Rad54l, Faah, Pik3r3                                                                                                                                                           |
|                                      | Med6                                 | is inside cluster                                | Cwc22 (region1), Cwc22 (region 2), Cwc22 (region 3)                                                                                                                            |
|                                      | Rbm25                                | is within 2MB from cluster                       |                                                                                                                                                                                |
| Ilvbl                                | is within 2MB from cluster           | Zfp347, LOC100125368, Mrpl54, Lsm7, Atp8b3, Mum1 |                                                                                                                                                                                |
| Gene id Chr7_1541.1                  | is within 2MB from cluster           | Pla2g6, Cby1, Gtpbp1, Rbx1                       |                                                                                                                                                                                |
| <i>Total regions</i>                 | <b>15 DMR</b>                        |                                                  | <b>51 regions (in 46genes) changed in gene expression</b>                                                                                                                      |
| LONG DISTANCE NON-CLUSTER REGULATION | Gng8                                 | is less than 2Mb distant from                    | Calm3                                                                                                                                                                          |
|                                      | Ceacam6                              | is less than 2Mb distant from                    | Exosc5                                                                                                                                                                         |
|                                      | Dll3                                 | is less than 2Mb distant from                    | LOC687295                                                                                                                                                                      |
|                                      | Gene id Chr1_1386.1                  | is less than 2Mb distant from                    | EST CV117152 (possibly Il4i1)                                                                                                                                                  |
|                                      | Tsku                                 | is less than 2Mb distant from                    | Odz4                                                                                                                                                                           |
|                                      | Cox8b                                | is less than 2Mb distant from                    | Lrrc56, Pnpla2                                                                                                                                                                 |
|                                      | Slc15a3                              | is less than 2Mb distant from                    | Pat1                                                                                                                                                                           |
|                                      | Slc1a1                               | is less than 2Mb distant from                    | Jak2, Insl6                                                                                                                                                                    |
|                                      | Slc10a4                              | is less than 2Mb distant from                    | Sgcb, Tec                                                                                                                                                                      |
|                                      | Peli1                                | is less than 2Mb distant from                    | Ugp2                                                                                                                                                                           |
|                                      | Gad2                                 | is less than 2Mb distant from                    | Thns1, Acbd5                                                                                                                                                                   |
|                                      | Mt2A                                 | is less than 2Mb distant from                    | Slc38a7, Bbs2                                                                                                                                                                  |
|                                      | Pou4f2                               | is less than 2Mb distant from                    | Abce1                                                                                                                                                                          |
|                                      | Esrp2                                | is less than 2Mb distant from                    | Exoc3l                                                                                                                                                                         |
|                                      | Lhx8                                 | is less than 2Mb distant from                    | Usp33                                                                                                                                                                          |
|                                      | Bat2l                                | is less than 2Mb distant from                    | Pomt1                                                                                                                                                                          |
|                                      | Tyro3                                | is less than 2Mb distant from                    | Rpusd2, Casc5                                                                                                                                                                  |
|                                      | Hdc                                  | is less than 2Mb distant from                    | Fbn1, Gene id chr3_1591.1 (possibly Ncaph), Gpat2                                                                                                                              |
|                                      | Acox1                                | is less than 2Mb distant from                    | Gene id chr3_1591.1 (possibly Ncaph), Gpat2                                                                                                                                    |
|                                      | Atp6v0b                              | is less than 2Mb distant from                    | Ppih                                                                                                                                                                           |
|                                      | Emilin1                              | is less than 2Mb distant from                    | Hadhb                                                                                                                                                                          |
|                                      | Rbm25                                | is less than 2Mb distant from                    | Sipa11l, Eif2b2                                                                                                                                                                |
|                                      | Npc2                                 | is less than 2Mb distant from                    | Eif2b2                                                                                                                                                                         |
|                                      | Rpl41                                | is less than 2Mb distant from                    | Sarnp                                                                                                                                                                          |
|                                      | NSCAN Chr7.521.a                     | is less than 2Mb distant from                    | LOC362855                                                                                                                                                                      |
|                                      | Rpl30                                | is less than 2Mb distant from                    | RGD1565493 (region 1), RGD1565493 (region 2)                                                                                                                                   |
|                                      | Gene id Chr7_1541.1                  | is less than 2Mb distant from                    | Pole3                                                                                                                                                                          |
|                                      | Krt83                                | is less than 2Mb distant from                    | EST FQ115996 (possibly Larp4)                                                                                                                                                  |
| Kb15                                 | is less than 2Mb distant from        | EST FQ115996 (possibly Larp4), Gtsf1             |                                                                                                                                                                                |
| Stt3a                                | is less than 2Mb distant from        | Ei24                                             |                                                                                                                                                                                |
| Zbtb16                               | is less than 2Mb distant from        | Pih1d2                                           |                                                                                                                                                                                |
| <i>Total regions</i>                 | <b>31 DMR</b>                        |                                                  | <b>39 regions (in 38 genes) changed in gene expression</b>                                                                                                                     |

Relations between vinclozolin-induced transgenerational DMR and expression changes in Sertoli cells
