# Supplementary material for: Environmentally Induced Epigenetic Transgenerational Inheritance of Altered Sertoli Cell Transcriptome and Epigenome: Molecular Etiology of Male Infertility
Source: PubMed Central journal article supplement (PMC3610698; doi:10.1371/journal.pone.0059922), 2013-03-28
Supplement: pone.0059922.s007.pdf [file pone.0059922.s007.pdf]

**Supplementary Table S4**

|    | CLUSTER LOCATION         | DMR INSIDE OR WITHIN 2MB OF A CLUSTER                  | GENES WITH EXPRESSION CHANGE IN THE CLUSTER                                                                                                    |
|----|--------------------------|--------------------------------------------------------|------------------------------------------------------------------------------------------------------------------------------------------------|
| 1  | chr1:39150000:42350000   |                                                        | Ldhal6b, Tmem181, Dynlt1                                                                                                                       |
| 2  | chr1:62450000:65850000   |                                                        | Eif5b (chr1), Cnot3, E2f5, Aurkc                                                                                                               |
| 3  | chr1:206250000:210350000 | Scyl1, Prdx5 (inside cluster)                          | Tmem134, Brms1, Gene id Chr1_3166.1 (possibly Rnaseh2c), mRNA BC090353 (possibly Malat1), Znhit2, Prdx5                                        |
| 4  | chr10:12150000:15050000  | RGD1562673 (inside cluster)                            | Srrm2, Pgp, Hagh                                                                                                                               |
| 5  | chr10:45700000:48600000  | Ubb (within 2MB from cluster)                          | Lrrc48, Mapk7, B9d1                                                                                                                            |
| 6  | chr10:53800000:59250000  | Kctd11, Rnasek (inside cluster)                        | Ccdc42, Odf4, RGD1563106, Tmem107, Dnah2, Eif4a1, Eif5a, Ybx2, Med11, Psmb6, Rpain                                                             |
| 7  | chr10:88500000:92250000  |                                                        | Tubg1, Ccdc56, Rpl27, LOC688211                                                                                                                |
| 8  | chr12:32400000:36300000  |                                                        | Rsrc2, Diablo (chr12), Gene id Chr12_661.1 (possibly Bcl7a), Wdr66, Rad9b                                                                      |
| 9  | chr14:8150000:11050000   |                                                        | Cds1, Mrps18c, Helq                                                                                                                            |
| 10 | chr14:81900000:85550000  |                                                        | Tacc3, Atp5e, Drg1, LOC685322                                                                                                                  |
| 11 | chr16:30450000:33850000  |                                                        | Cbr4, Sh3rf1, Nek1                                                                                                                             |
| 12 | chr17:48150000:52050000  |                                                        | RGD1564767, Zfp322a, LOC680322, Hist1h2bn, Zfp187                                                                                              |
| 13 | chr19:22950000:26800000  | Nanos3 (inside cluster)                                | RGD1564093, Junb, Syce2, Asf1b                                                                                                                 |
| 14 | chr19:38500000:42400000  | Gene id Chr19_655.1 (possibly Wrd59) (inside cluster)  | Gene id Chr19_654.1 (possibly Hydin -region 1), Gene id Chr19_634.1 (possibly Hydin -region 2), Gene id Chr19_634.1 (possibly Hydin -region 3) |
| 15 | chr2:188900000:191150000 |                                                        | Zc3h11a, Psmb4, Vps45                                                                                                                          |
| 16 | chr3:3150000:7800000     |                                                        | Ssna1, Qsox2, Mrpl41 (chr3), Rpl7a (region 1), Rpl7a (region 2), Surf4                                                                         |
| 17 | chr3:168850000:171000000 |                                                        | Gene id Chr3_2440.1 (possibly Lsm14b), RGD1305899, Tcea2                                                                                       |
| 18 | chr5:77500000:81400000   | Pole3, Ccdc17 (inside cluster)                         | Fkbp15, Wdr31, Bspry, Atp6v1g1                                                                                                                 |
| 19 | chr5:134600000:138150000 | Atp6v0b (within 2MB from cluster)                      | Rad54l, Faah, Pik3r3                                                                                                                           |
| 20 | chr6:102050000:105600000 | Med6 (inside cluster), Rbm25 (within 2MB from cluster) | Cwc22 (region1), Cwc22 (region 2), Cwc22 (region 3)                                                                                            |
| 21 | chr7:7950000:12350000    | Ilvbl (within 2MB from cluster)                        | Zfp347, LOC100125368, Mrpl54, Lsm7, Atp8b3, Mum1                                                                                               |
| 22 | chr7:116000000:119850000 | Gene id Chr7_1541.1 (within 2MB from cluster)          | Pla2g6, Cby1, Gtpbp1, Rbx1                                                                                                                     |
| 23 | chr8:73000000:75750000   |                                                        | Rora, Narg2, Rnf111, Adam10                                                                                                                    |
| 24 | chr9:72550000:75700000   |                                                        | Gene id Chr9_929.1 (possibly Usp37), Stk36, Gene id Chr9_958.1                                                                                 |

Clusters of transgenerational changes in gene expression and their relation to DMR in vinclozolin-lineage F3 Sertoli cells
